# Supplementary material
Source: HighWire-hosted journal article supplement (doi:10.1101/rna.038232.113)
Supplement: Figure_S1.pdf [file Figure_S1.pdf]

GACAATGTTTTATCAGCTCACATTCAGCAGCCCGCGTTCTTCGCTCTCTTGACGTGTTTTCCGGTTCGG  
CTGGGTGTCT**ATG**CGCTAGATACAGCCCGGAAATGATGGAGGATGAGGAGTTGGAAGACGGGGAGCTTA  
GCGGCTCTGACACAGATATGAGATCGTCGGGCGCGGGGACAGAGGGCAGCAGAAAACCGATTCAATCGG  
CACTTCATTCACTTACCGAAGTAATAGTTCCCACTCAAATAATGTCCCCTACCGAATAATGAAAGGTCTG  
GACTCAAGCGAAGACAGTGCATCTGATTCTGATGACGAAGATGGTTCTTCGTGGAAACGTAAGCGGCAGA  
AGTCTACCCACCCAGCCCTAAAATGGCCAGACCTCTTCTATATTGCAGGGCCAACAAAGGCCTATTAG  
CACAGGGGGCACAAAACGTAATAATGTTTGGGGAGCTGTCTTCAGGAGCAGACTCAAGAGGCTGTGGCA  
ACTGAATTGGGTATTATGGACATGGAAGGGCAGCTGGATATGAGCAGACAGTCTGAGACATACAATTATG  
TGCTTGCCAGGAAATGATGGAAAAATCAACCAAGGAGGAAGAGCTGAAGCTGGACAAAAGAAATAGATGA  
GTACATGCAAGAGGATAAAGAATCTGCTCCAAAGGAGGAAAATGGGCACCTCAAGAGGAAGCGCCCAAT  
AAAGAAAGACTGGGAGAAAGGTTAGAAATGGAGTACAAGGGCAGATATGAAATAACTGAAGCTGACTCAG  
AAGATAAAGTCTCTGATGAAATTGCATATAGACTCCGAGAGCCAAAGAAAAGATTTAATAGAGCGGGTGT  
AAAAACTTTGGAACCAAGAAGGCTATTGAGTTGCTTATGGAACTGCAGAAGTGGAAACAGAGCGGTGGA  
CTCTTCAATTATGAATGGCAGTAGGAGGAGGACTCCTGGAGGAGTATATCTGAACTTATTAATAAATACAC  
CAAGTATTACATCAGATCAAGTGAAGGAAATATTTTATGTAGAAAACAGAAGGAATATGAGAGTAAAA  
GGCAGCCCAAAAGAAAAGGCGGCATTTAATTGGGAAGAAGATGAAGGAAGCCATCAAAGGCTTTAACTTC  
CAAGATCACGACGACACCTCGAGAGAGACGTTTGCAAGTGACACCAATGAAGCGCTGGCTTCTCTAGATG  
ACGAACACACGGAAATGAAAGCAGACACAGAGGATGCCATTGAGATCGACAACCTCCCATGACCTTGAGAC  
TTTT**TAAT**TGGCATTGCTGGACATTGTAAATGGCTTTATTACATTTCAAAGCTGCAAAAATATAGAACATT  
AGGGAGCAAAGCTGTTAATGAAAGACTGCTGCATAGGAGAAACAATAGATTAGAAATGAGAAGCATTTCGT  
TTCTAATTGGTGGCACCACCATTGTTTTGTTAACTTTGCCTTGTTGCTTTTATTATCATACATATTAG  
TGTCCACTAAAAATCAAAGTTCAAACAATACATTTTGTATGCTTATACATTAATCGAATCATCTAGAACT  
GACCGTGACCAAAAATCAAACAATACATTTTGTATGTTGACATCAGAACAGGAAGTTGGTAGCATT  
TATTGCCCCAGCAATCAACCTCCATTCAAGGTAAATTGGATTTGCCGTGATCTTGATCTGTCTGTCTG  
GTGACGGGTGCAAACTACTTGAACAACTTTTTGTGTTGCGCACTTGTACCAGACAGGACAGAGCACCAT  
TTTGGCATTTCCTATTCTCTTTTGAATGGGAGGGAGGTTTAGAATATTTTGCCTCCTTCCCTCGGAGTGA  
TAAATCACTGGGGCTACTGTGTTCCACTGTCATTAGCCTGCTAGTTGCTGTGATTCCAAAATATCAAGA  
ATTGGCCACAAGAATATATACACGACCTCTGAGTTCCCTACAGCTCCACTACATCACTGCTAGTCACTCT  
TTCTTCAACCCTCTTATACAAGTGTGTTGGAGCTGGCTGCTTCAAGCAATTCCTACTATTACCGCCACCTA  
TAGAACTTTTTAAAGAGGGGCTTCAAGCAGGCTCAAACCTCTGCTCGTTGTTAAAATATACAGTGTGAA  
GATAATATTTACATATTCTAGGGATGCACTGAATCTGCGATTTTTGGGATTTGGCCGAATTTGTGAAATATT  
AAGCCAAATACTGAGCTGAATTGAAATCCTTATTTGCATATACAAATGAGCTCAGGAAGGGAGAAAGAG  
AACCCCGTATGTAGTTAAAACAATGTTTAAATTCCTGTTTGTATAACGAAAAGTCACGTGACTTTAAGGA  
TTCGGTTTGGCCAGGACAGGAGATTCAACCCAAATCCAAATCTGTTGAAAAGACCAACAGAATCCTG  
AATTGCGTGCATTCTTAATTAATTCCTGTTCTAGGCAGTCTTGACTAATGGCAGAGACACCGGCAATT  
TGGGAGGTTAATCACCCGGCGATAAATCTCCTCTTCTCGGGCAACTAATCTCCCTGACCTGCCTTCC  
CGCCAGCGATTTTCTGGCACTCTGAGCAATTCGCTTTCCGAAGTTCTTGTGAGGGCGACTAATCTCCCCG  
AATTTCCCGTGTGTGCTCTGCCCCTAAAGGATTGTGTGCCCCCTGCTAAAAGGATATCCGACATCAAACC  
TTGGAGTTTTGTGACTGAAAGCAGTTTTCTTGATTTTTGTAACCTTACAATAGGGGAATACTAACCTTATCGC  
AGAATACAATTAACATAATGCTTTTGTCTATTGAACTTGAATTGTTTTTGTCTTTTGGCATGTTTATTAT  
GTTTATAAAATGAAGGCATTTTACTGCTTCAAGTTAATTGGAGTATTTTTTGTCTTTTATTGTCATGTG  
ATGGGCATGCTGAAAAGTACAAAGAATTACAACTGCCCCATATGTAGATACATTTTGTCTTCTCTGCT  
TAGTTAGTTAGGAACACAATGTGTGTGCAATGTCAGTGTCTGGCTGTACCATCATTTTCATGGATTCAATTA  
TGCCACTACTACACAGTGCCTATGTTGTACATGGAGATCTGATTAGGTTTTGTTTTTCCAATGGAGGTAA  
TAAATATTTTAGACACTTTTTCTAAAGTCTATAGTTCTGAACAATTTGATTTGTGTTTATGTATGACTGT  
TAAATATGCCTACATAATACTCTTTGGGGTCTTCCCTGAAAGTATGTATTTGAAGTTTCACTATTTTACTG  
ATCTATCCCTAAAGCTAAAATCATGGGAGAACAACCTTTCCTCTGTATCAATGTAGTGTCCGCCCCACACG  
TGCCACCAAGGTGTTCTTGACAGTTGTTGGGCTGCATGTTGAATATCCAAAAAGCAGCCATACACTGG  
TTAACCATGTTGAGTAGGCAACTGATTAGCCTCCGGGGTAAATAGAACGATACCCTACAAGAATATGACC  
ATCTGTAAATTTTTGTTTTAACAGCAGGAAGTGAAGTACTGCCGACCCTCTTCACT**TCCTCTTCTGCTGAT**  
**GCAATGTGGTCTGGCCGCCCTGATACAACGGCAGATGACTTTTCCAAACCTGTCCCACTGGCAAACCCAC**  
**CAATATCCATAGTACGTAGATAACTGTTGATCGCTGTGCTTTTATACACATACCAATAAAAAATAAAAGT**  
**CTGAAACTT**

Figure S1. A full-length version of oocyte PHAX mRNA. The sequence of NM\_001096115.1 (blue) was overlapped with portions of EST sequences AW767185 (black) and AW766532 (red) to generate a 3,649 nt transcript. The PHAX ORF is underlined with the start (nt 80) and stop (nt 1265) codons in bold. The putative oocyte-specific polyadenylation sequence is in bold.
