# Supplementary material
Source: HighWire-hosted journal article supplement (doi:10.1101/rna.038232.113)
Supplement: Figure_S2.pdf [file Figure_S2.pdf]

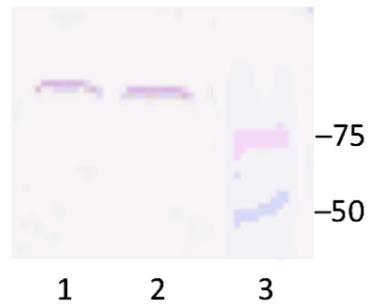

Figure S2. Western blot assay of oocyte extract with Stau1 antibody. The RIP-certified, affinity purified antibody used for immunoprecipitation assays was tested against whole cell extract prepared from mixed stage oocytes. *Lanes 1 and 2* are two different samples of oocyte extract; *lane 3* contains molecular weight markers with mass indicated in kDa.
