# Supplementary material
Source: HighWire-hosted journal article supplement (doi:10.1101/rna.038232.113)
Supplement: Table_S1.pdf [file Table_S1.pdf]

**Table S1**  
**Contiguous Expressed Sequence Tags Used to Construct**  
**Hypothetical Transcript<sup>a</sup>**

|   | Accession Number |
|---|------------------|
| 1 | AW766532         |
| 2 | AW767185         |
| 3 | BG161020         |
| 4 | BJ643862         |
| 5 | BJ063397         |

<sup>a</sup> Entries are listed progressing from the 3' to the 5' end of the transcript
