# Supplementary material
Source: HighWire-hosted journal article supplement (doi:10.1101/rna.038232.113)
Supplement: Table_S2.pdf [file Table_S2.pdf]

**Table S2****Frequency of E2 and VM1 Motifs in RNAs Localized to the Animal Hemisphere of *Xenopus* Oocytes**

| RNA           | Accession number | ORF |     | 3'UTR |     |
|---------------|------------------|-----|-----|-------|-----|
|               |                  | E2  | VM1 | E2    | VM1 |
| $\beta$ -TrCP | NM001087595      | 5   | 0   | 0     | 5   |
| An1           | NM001087867      | 12  | 12  | 3     | 5   |
| An2           | BC080064         | 7   | 8   | 0     | 1   |
| An3           | NM001101775      | 3   | 7   | 0     | 0   |
| An4           | BC045089         | 8   | 14  | 2     | 2   |
| Ets 1a        | NM001087613      | 5   | 7   | 13    | 14  |
| Ets 2b        | NM001088036      | 5   | 5   | 4     | 6   |
| Xpar-1a       | NM001090787      | 11  | 6   | 3     | 1   |
| Xpar-1b       | NM001088923      | 10  | 16  | 5     | 3   |
| Fibronectin   | NM001087801      | 47  | 36  | 3     | 3   |
| XLPOU60       | NM001088114      | 3   | 7   | 2     | 10  |
| PAPB          | NM001088625      | 4   | 11  | 1     | 2   |
| Vg1RBP (A)    | NM001086563      | 13  | 8   | 4     | 3   |
| Vg1RBP (D)    | NM001088283      | 11  | 8   | 3     | 2   |
| ARH $\beta$   | AY344472         | 2   | 2   | 2     | 2   |
| xI21          | NM001088353      | 9   | 6   | 0     | 2   |
| XG $\beta$ 1  | BC084263         | 7   | 6   | 4     | 17  |
| Xlan4         | M94969           | 6   | 4   | 3     | 8   |
| Coco          | BC099052         | 2   | 3   | 1     | 2   |
| PHAX          | NM001095016      | 1   | 3   | 12    | 17  |

E2 sequences WYCAC (where W = A or U)

VM1 sequences YYUCU (where Y = C or U)
