# Supplementary material
Source: HighWire-hosted journal article supplement (doi:10.1101/rna.038232.113)
Supplement: Table_S3.pdf [file Table_S3.pdf]

**Table S3**  
**Plasmids and RNA Synthesis**

| Plasmid                                                                                                                                                                                                                                                                                                                                                                           | Insert                                                                                                                                                                                                                                                                                                                                                                                                                                                                                                                                                                                                                                                                                                                                         | RNA Product (Run-off transcription)                                                                                                                                                                                                                                                                                   |
|-----------------------------------------------------------------------------------------------------------------------------------------------------------------------------------------------------------------------------------------------------------------------------------------------------------------------------------------------------------------------------------|------------------------------------------------------------------------------------------------------------------------------------------------------------------------------------------------------------------------------------------------------------------------------------------------------------------------------------------------------------------------------------------------------------------------------------------------------------------------------------------------------------------------------------------------------------------------------------------------------------------------------------------------------------------------------------------------------------------------------------------------|-----------------------------------------------------------------------------------------------------------------------------------------------------------------------------------------------------------------------------------------------------------------------------------------------------------------------|
| pCSPHAX (IMAGE 3199647)                                                                                                                                                                                                                                                                                                                                                           | AW766532 and AW767185                                                                                                                                                                                                                                                                                                                                                                                                                                                                                                                                                                                                                                                                                                                          | Plasmid digested with XhoI generates sense strand PHAX transcript from nt 2979 to 3655 using SP6 RNAP.<br>Plasmid digested with Eco RI generates antisense strand PHAX from nt 2979 to 3655 using T7 RNAP.                                                                                                            |
| pSPORTAn1FL                                                                                                                                                                                                                                                                                                                                                                       | An1, complete                                                                                                                                                                                                                                                                                                                                                                                                                                                                                                                                                                                                                                                                                                                                  | Plasmid digested with XhoI generates full length An1 transcript from nt 1 to 3011 using SP6 RNAP.<br>Plasmid digested with Apa LI generates An1 $\Delta$ 3' transcript from nt 1 to 2423 using SP6 RNAP.<br>Plasmid digested with HindIII generates An1 $\Delta\Delta$ 3' transcript from nt 1 – 1571 using SP6 RNAP. |
| pBSAn1PORF<br>pBSAn1 $\Delta$ E1<br>pBSAn1 $\Delta$ E2<br>pBSAn1 $\Delta$ E3<br>pBSAn1 $\Delta$ E12<br>pBSAn1 $\Delta$ E13<br>pBSAn1 $\Delta$ E23<br>pBSAn1 $\Delta$ E123<br><br>pBSAn1 $\Delta$ VM1<br>pBSAn1 $\Delta$ VM2<br>pBSAn1 $\Delta$ VM3<br>pBSAn1 $\Delta$ VM12<br>pBSAn1 $\Delta$ VM13<br>pBSAn1 $\Delta$ VM23<br>pBSAn1 $\Delta$ VM123<br><br>pBSAn1 $\Delta$ VM1235 | An1 (nt 1456-2836)<br>1 <sup>st</sup> E2 mutated<br>2 <sup>nd</sup> E2 mutated<br>3 <sup>rd</sup> E2 mutated<br>1 <sup>st</sup> & 2 <sup>nd</sup> E2 mutated<br>1 <sup>st</sup> & 3 <sup>rd</sup> E2 mutated<br>2 <sup>nd</sup> & 3 <sup>rd</sup> E2 mutated<br>1 <sup>st</sup> , 2 <sup>nd</sup> & 3 <sup>rd</sup> E2 mutated<br><br>1 <sup>st</sup> VM1 mutated<br>2 <sup>nd</sup> VM1 mutated<br>3 <sup>rd</sup> VM1 mutated<br>1 <sup>st</sup> & 2 <sup>nd</sup> VM1 mutated<br>1 <sup>st</sup> & 3 <sup>rd</sup> VM1 mutated<br>2 <sup>nd</sup> & 3 <sup>rd</sup> VM1 mutated<br>1 <sup>st</sup> , 2 <sup>nd</sup> & 3 <sup>rd</sup> VM1 mutated<br><br>1 <sup>st</sup> , 2 <sup>nd</sup> , 3 <sup>rd</sup> & 5 <sup>th</sup> VM1 mutated | Plasmid digested with XhoI generates WT or indicated mutant An1 transcript from nt 1456 to 2836 using T7 RNAP.                                                                                                                                                                                                        |
| pSP70Vg1                                                                                                                                                                                                                                                                                                                                                                          | Vg1, complete                                                                                                                                                                                                                                                                                                                                                                                                                                                                                                                                                                                                                                                                                                                                  | Plasmid digested with Eco RI generates full length sense strand Vg1 using SP6 RNAP.<br>Plasmid digested with HindIII generates full length antisense strand Vg1 using T7 RNAP.                                                                                                                                        |
| pBSVg1-B                                                                                                                                                                                                                                                                                                                                                                          | Vg1 VLE (nt 1440-1816)                                                                                                                                                                                                                                                                                                                                                                                                                                                                                                                                                                                                                                                                                                                         | Plasmid digested with Bam HI generates Vg1 transcript from nt 1440 to 1816 using T7 RNAP.                                                                                                                                                                                                                             |
| Vg1.1                                                                                                                                                                                                                                                                                                                                                                             | Vg1, complete                                                                                                                                                                                                                                                                                                                                                                                                                                                                                                                                                                                                                                                                                                                                  | Plasmid digested with Kpn1 generates full length Vg1 transcript using T7 RNAP.<br>Plasmid digested with NdeI generates truncated Vg1 transcript missing the 3' UTR using T7 RNAP.                                                                                                                                     |
| pBS KS II                                                                                                                                                                                                                                                                                                                                                                         | Empty vector                                                                                                                                                                                                                                                                                                                                                                                                                                                                                                                                                                                                                                                                                                                                   | Plasmid digested with PvuII generates a 356 nt nonsense RNA transcript using T7 RNAP for use in UV crosslinking.                                                                                                                                                                                                      |
